# Supplementary material
Source: MDPI journal article supplement (https://www.mdpi.com/2073-4344/13/5/844)
Supplement: s1 [file s1]

# Cobalt-/pH-Modified V<sub>2</sub>O<sub>5</sub>-MoO<sub>3</sub>/TiO<sub>2</sub> Catalyst with Enhanced Activity for the Low-Temperature Selective Catalytic Reduction Process

## Supplementary Materials

**Table S1.** NO removal efficiency under laboratory conditions of Co-doped or pH-regulated catalysts.

| Sample                                                         | Preparation method                            | Reaction condition                                                                                                 | NO(NO <sub>x</sub> ) conversion | Ref  |
|----------------------------------------------------------------|-----------------------------------------------|--------------------------------------------------------------------------------------------------------------------|---------------------------------|------|
| 1CoVMT-10                                                      | Impregnation/<br>pH value of 10               | [NO <sub>x</sub> ] = [NH <sub>3</sub> ] = 700 ppm,<br>[O <sub>2</sub> ] = 5%, GHSV = 30000<br>h <sup>-1</sup>      | >90% (160–240 °C)               | -    |
| Co <sub>1</sub> Mn <sub>4</sub> Ce <sub>5</sub> O <sub>x</sub> | Co-precipitation                              | [NO] = [NH <sub>3</sub> ] = 500 ppm,<br>[O <sub>2</sub> ] = 5%, GHSV = 48,000<br>h <sup>-1</sup>                   | 90%-93% (125–175 °C)            | [10] |
| Mn–Co/TiO <sub>2</sub>                                         | sol-gel                                       | [NO] = [NH <sub>3</sub> ] = 600 ppm,<br>[O <sub>2</sub> ] = 5%, GHSV = 108,000<br>h <sup>-1</sup>                  | >98% (200 °C)                   | [11] |
| Co/ZSM-5                                                       | impregnation                                  | [NO] = [NH <sub>3</sub> ] = 500 ppm,<br>[O <sub>2</sub> ] = 5%, GHSV = 80000<br>mL·g <sup>-1</sup> h <sup>-1</sup> | >92% (175–300 °C)               | [3]  |
| Cu-SSZ-13                                                      | one-step ion-exchange/<br>pH value of 4 and 5 | [NO <sub>x</sub> ] = [NH <sub>3</sub> ] = 600 ppm,<br>[O <sub>2</sub> ] = 5%, GHSV = 450,000<br>h <sup>-1</sup>    | >90% (250–450 °C)               | [7]  |
| LM-1.4                                                         | sol-gel/<br>pH value of 1.4                   | [NO <sub>x</sub> ] = [NH <sub>3</sub> ] = 500 ppm,<br>[O <sub>2</sub> ] = 5%, GHSV = 30,000<br>h <sup>-1</sup>     | ~100% (160–200 °C)              | [8]  |

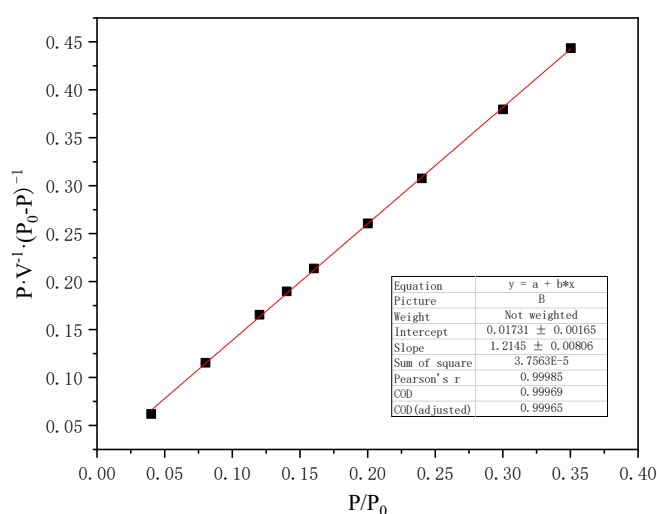

**Figure S1.** BET fitting curve of VMT catalyst

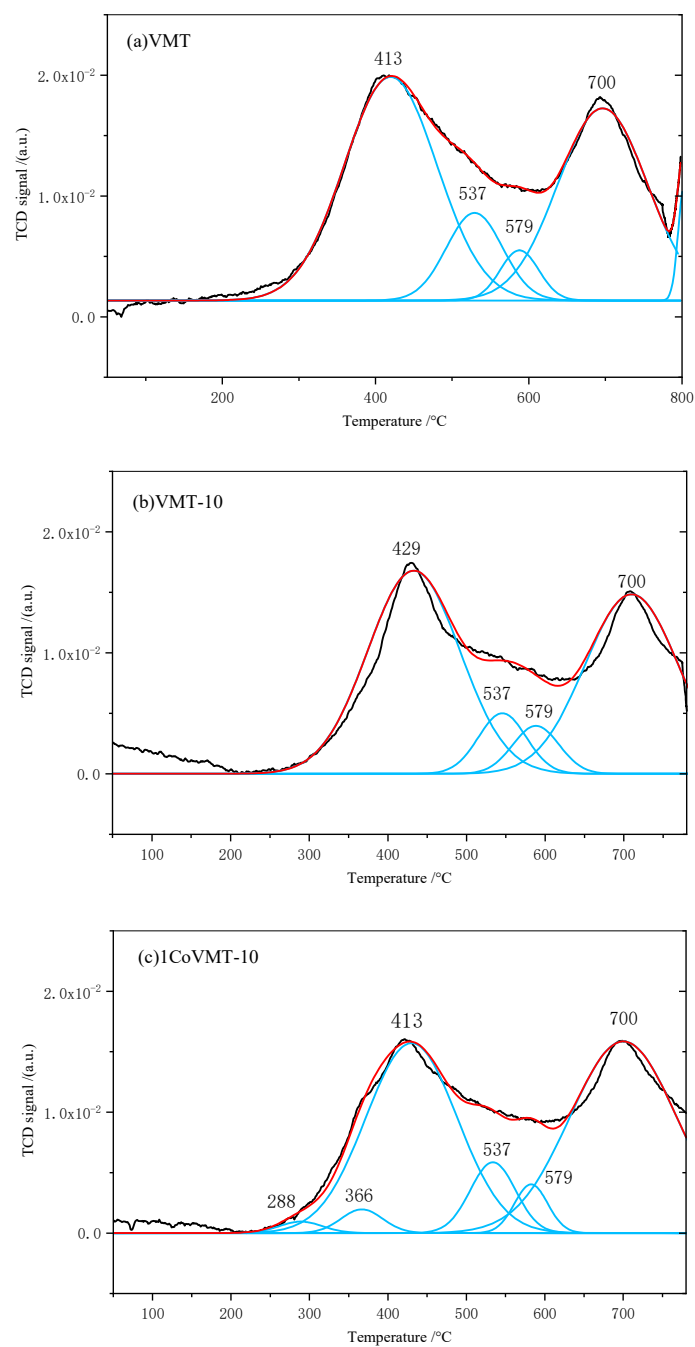

**Figure S2.** H<sub>2</sub>-TPR profiles of the catalyst samples: (a) VMT; (b) VMT-10; (c) 1CoVMT-10.

**Table S2.** Peak area of vanadyl species species from fitting data

| Sample    | isolated monomeric<br>species ( $\leq 497\text{--}507\text{ }^{\circ}\text{C}$ )(%) | polymeric species<br>( $537\text{ }^{\circ}\text{C}$ ) (%) | bulk amorphous ( $579\text{ }^{\circ}\text{C}$ )<br>(%) |
|-----------|-------------------------------------------------------------------------------------|------------------------------------------------------------|---------------------------------------------------------|
| VMT       | 60.7                                                                                | 21.3                                                       | 18.0                                                    |
| VMT-10    | 78.6                                                                                | 12.1                                                       | 9.2                                                     |
| 1CoVMT-10 | 79.4                                                                                | 13.3                                                       | 7.2                                                     |
